# Supplementary material
Source: publisher figshare collection journal article supplement (https://acs.figshare.com/ndownloader/files/5701806)

Supporting Information for

**Transient Absorption Studies of the Pacman Effect in Spring-loaded  
Diiron(III)  $\mu$ -oxo Bisporphyrins**

Justin M. Hodgkiss, Christopher J. Chang, Bradford J. Pistorio and Daniel G. Nocera\*

*Department of Chemistry, 6-335, Massachusetts Institute of Technology, 77 Massachusetts Avenue,  
Cambridge, Massachusetts 02139-4307*

|                                                    |    |
|----------------------------------------------------|----|
| Estimate of maximum TA signal of OAT photoproduct  | S2 |
| Estimate of lower limit for $\Phi_{\text{spring}}$ | S2 |
| Figure S1                                          | S4 |

### *Estimate of maximum TA signal of OAT photoproduct*

Our estimate of the maximum possible TA signal generated by the diferrous form is based on the application of Beers law. We measured  $\epsilon(\text{PFe}^{\text{II}}/\text{PFe}^{\text{II}}) = 1.73 \times 10^7 \text{ M}^{-1}\text{cm}^{-1}$  at 541.5 nm. (because this is an isosbestic point for the photogenerated  $\text{PFe}^{\text{II}}/\text{PFe}^{\text{IV}}\text{O}$  intermediates, i.e. their contribution to  $\Delta\text{OD} = 0$ , thus it is at this wavelength that the photoproduct can be measured relative to a zero background intensity). The maximum possible concentration of this photoproduct that could be detected is the initial diiron  $\mu$ -oxo bisporphyrin concentration ( $5 \times 10^{-5} \text{ M}$ ) multiplied by the product quantum yield (greatest measured  $\Phi_p = 7.4(7) \times 10^{-4}$  for  $(\text{DPD})\text{Fe}_2\text{O} + 0.2 \text{ M P(OMe)}_3$ ) and scaled by 0.5 to take account of the greatest effective concentration that can be detected when both pump and probe are polarized parallel to each other). Thus  $c_{\text{max}}(\text{PFe}^{\text{II}}/\text{PFe}^{\text{II}}) = 1.9 \times 10^{-8} \text{ M}$ . This conservatively assumes that every molecule being probed had previously absorbed an excitation photon into the photoactive LMCT transition, which is clearly an overestimation. Nevertheless, a maximum  $\Delta\text{OD}$  can be estimated based on the most positive assumptions, given  $\Delta\text{OD}_{\text{max}} = \Delta(\epsilon c l) \sim \epsilon(\text{PFe}^{\text{II}}/\text{PFe}^{\text{II}}) \times c_{\text{max}}(\text{PFe}^{\text{II}}/\text{PFe}^{\text{II}}) \times \ell$  ( $\Phi_p$  is low enough that the concentration of the diiron  $\mu$ -oxo bisporphyrin reformed after excitation is virtually the same as it was initially, accordingly it needn't be accounted for in the  $\Delta\text{OD}$  estimate). On this basis,  $\Delta\text{OD}_{\text{max}} \sim 5 \times 10^{-5}$  which is already at least 2 orders of magnitude less than the TA signals measured in this study for the photogenerated  $\text{PFe}^{\text{II}}/\text{PFe}^{\text{IV}}\text{O}$  intermediate. Under more realistic assumptions and in less efficient systems,  $\Delta\text{OD}$  for the photoproduct appearance could be several orders of magnitude smaller than  $5 \times 10^{-5}$ .

### *Estimate of lower limit for $\Phi_{\text{spring}}$*

The lower limit for  $\Phi_{\text{spring}}$  is also based on the application of Beers law. The measured TA spectrum of the  $\text{PFe}^{\text{II}}/\text{PFe}^{\text{IV}}\text{O}$  species can be rescaled from  $\Delta\text{OD}$  to  $\Delta\epsilon$ , with the resulting scaling factor being the inverse of the concentration of the 'sprung open' form multiplied by the cell pathlength. In order to rescale to  $\Delta\epsilon$  we observe that the TA spectrum in the 530-620 nm region consists of the bleach of the ground-state Q-bands (565, 590 nm) overlaid by a positive

transient absorption. Thus we estimate that the bleach of the 565-nm band for the bisporphyrin ( $\Delta\epsilon = -19000 \text{ M}^{-1}\text{cm}^{-1}$ ) corresponds to  $\Delta\text{OD} \sim -0.015$  in the TA spectrum. This method of scaling  $\Delta\text{OD}$  to  $\Delta\epsilon$  using the Q-band bleach as a metric has been employed before in porphyrin TA spectroscopy.<sup>1</sup> After taking account of the effective concentration that can be detected when both pump and probe are polarized and set at the magic angle with respect to each other ( $c_{\text{eff}} = 0.29 \times c_0$  assuming that the dipole moments of the porphyrin transitions probed are orthogonal to that of the LMCT excited), we find that the minimum concentration of the  $\text{PFe}^{\text{II}}/\text{PFe}^{\text{IV}}\text{O}$  species that could produce this  $\Delta\text{OD}$  signal is;  $\Delta\text{OD} / (\Delta\epsilon \times \ell) \times (c_0 / c_{\text{eff}}) = 1.4 \times 10^{-5} \text{ M} = 0.28 \times \text{initial concentration of diiron } \mu\text{-oxo bisporphyrin}$ . Once again this analysis conservatively assumes that every molecule probed had previously absorbed a photon into the photoactive LMCT transition. Thus we can conservatively set a lower limit for  $\Phi_{\text{spring}} = 0.25$ .

## References

- (1) Rodriguez, J.; Kirmaier, C.; Holten, D. *J. Am. Chem. Soc.* **1989**, *111*, 6500 - 6506.

**Figure S1.** Spectra of probe light generated by focusing 810-nm, 100-fs pulses into spinning CaF<sub>2</sub> (solid), and sapphire (dashed).

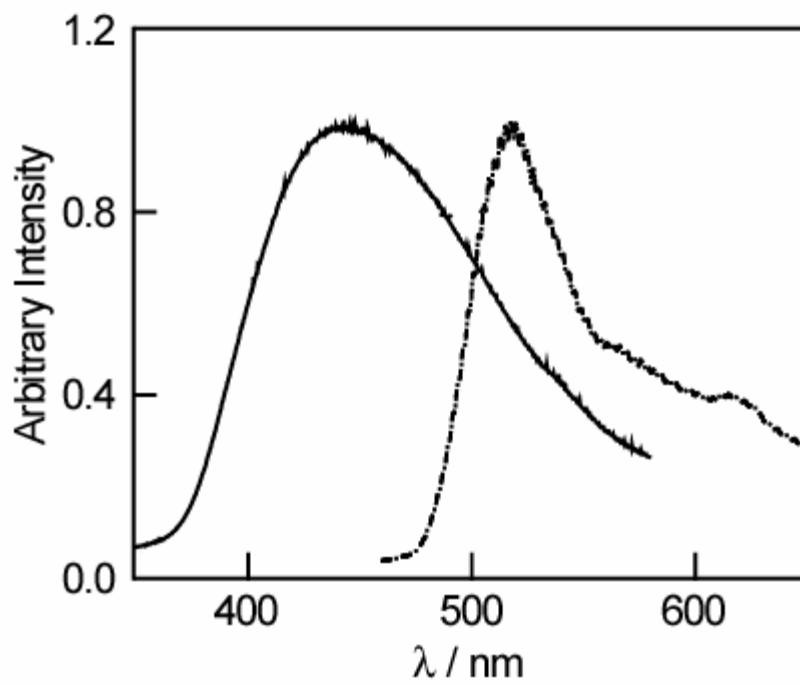

Supplement: Supplementary file 1 [file 5701806]
